# Supplementary material for: Wheat Germination Is Dependent on Plant Target of Rapamycin Signaling
Source: PubMed Central journal article supplement (PMC7719826; doi:10.3389/fcell.2020.606685), 2020-11-23
Supplement: Data_Sheet_1.pdf [file Data_Sheet_1.pdf]

**Supplementary Information**

**Wheat Germination Is Dependent on Plant Target of Rapamycin Signaling**

**Bauyrzhan Smailov<sup>1,2</sup>, Sanzhar Alybayev<sup>1,2</sup>, Izat Smekenov<sup>1,2</sup>, Aibek Mursalimov<sup>1,2</sup>, Murat Saparbaev<sup>1,3,\*</sup>, Dos Sarbassov<sup>4,\*</sup> and Amangeldy Bissenbaev<sup>1,2,\*</sup>**

<sup>1</sup>Department of Molecular Biology and Genetics, Faculty of Biology and Biotechnology, al-Farabi Kazakh National University, Almaty, Kazakhstan

<sup>2</sup>Scientific Research Institute of Biology and Biotechnology Problems, al-Farabi Kazakh National University, Almaty, Kazakhstan

<sup>3</sup>Groupe «Mechanisms of DNA Repair and Carcinogenesis», Equipe Labellisée LIGUE 2016, CNRS UMR9019, Université Paris-Sud, Gustave Roussy Cancer Campus, F-94805 Villejuif Cedex, France

<sup>4</sup>Department of Biology, Nazarbayev University, Nur-Sultan, Kazakhstan

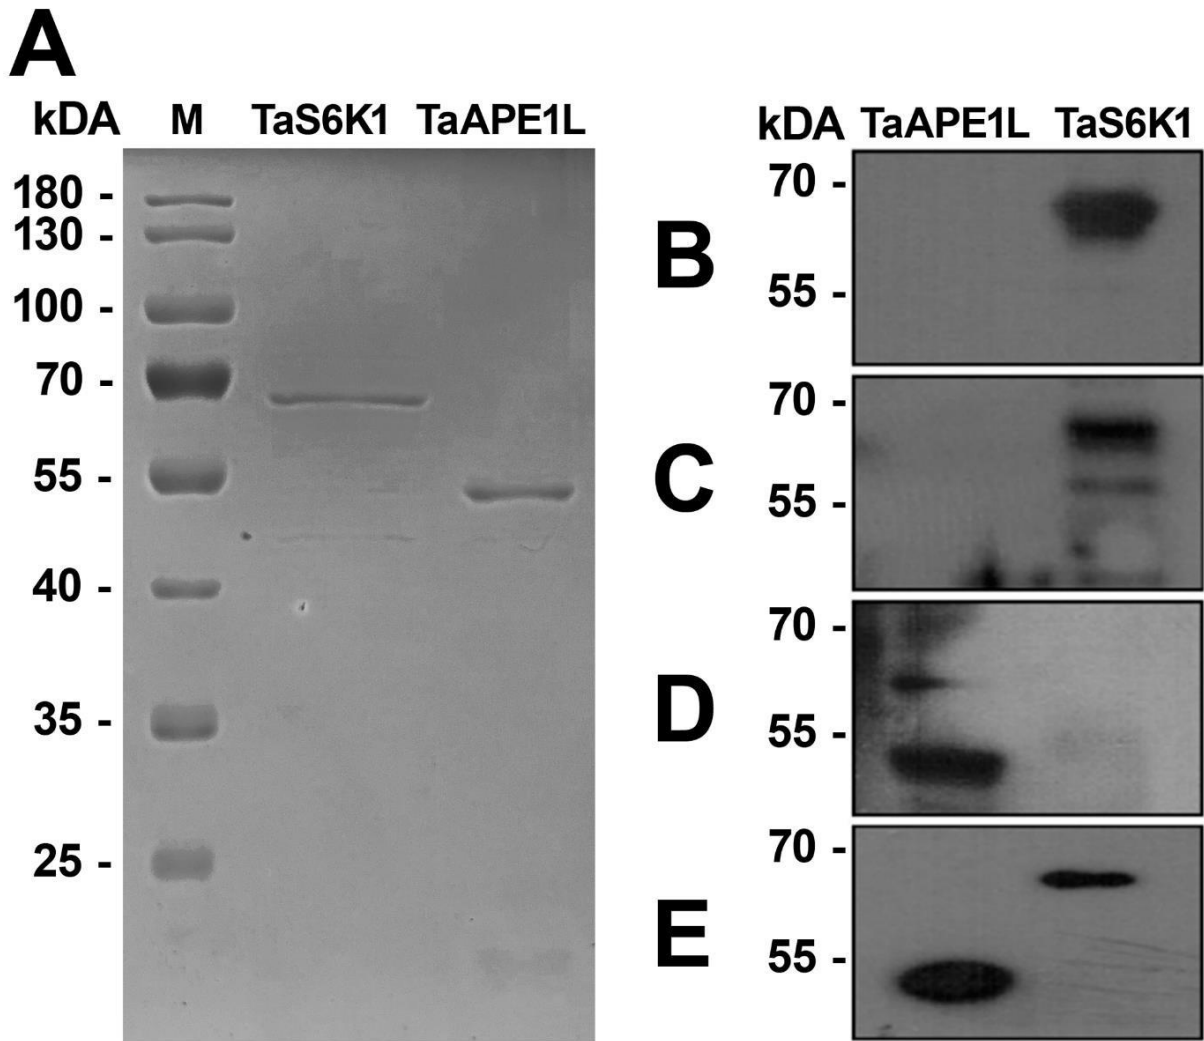

**Supplementary Figure S1.** Detection of the purified TaS6K1 protein by the anti-TaS6K1 antibody. (A) SDS-PAGE analysis of the purified recombinant TaS6K1 and TaApe1L proteins. Lane 1, protein size markers; lane 2, TaS6K1, 0.5 µg; lane 3, TaApe1L, 1 µg; Western blot analysis with anti-TaS6K1 (B), anti-RPS6KB1 (Ab-389) (C), anti-TaApe1L (D), and anti-His antibodies (E). In all four western blots, 1 µg of purified 6xHis-APE1L was loaded in the first lane and 0.5 µg of purified 6xHis-TaS6K1 in the second lane.

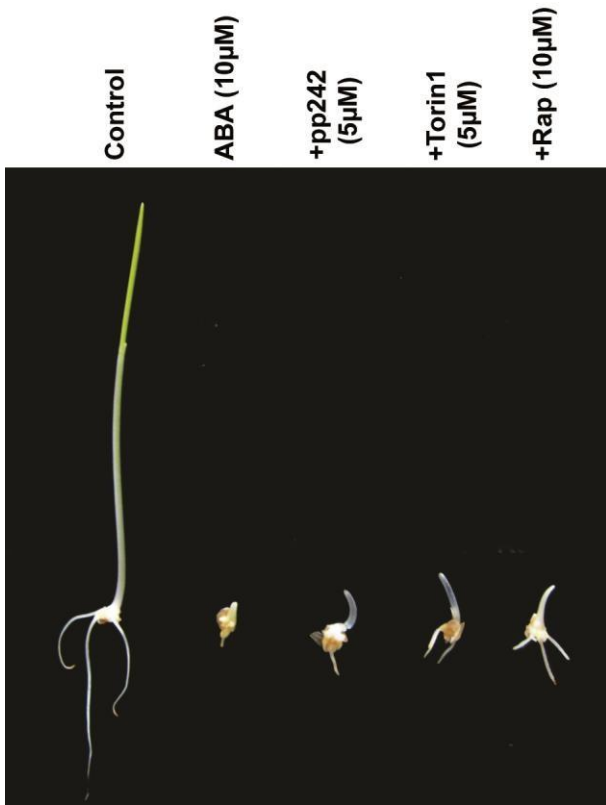

**Supplementary Figure S2.** The effect of rapamycin and ATP-competitive TOR inhibitors on isolated wheat embryos. The embryos were incubated on the 0.5× MS medium supplemented with ABA alone and rapamycin, torin1, or pp242 as indicated for 4-day incubation.

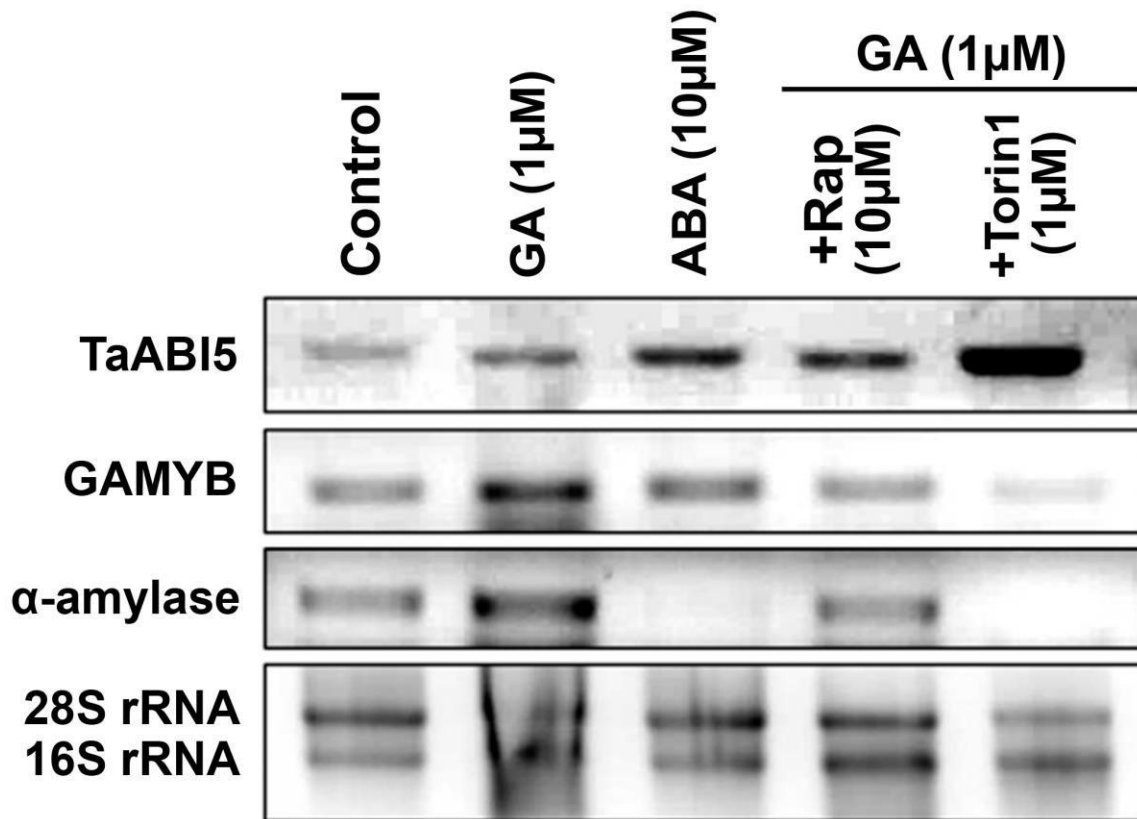

**Supplementary Figure S3.** The influence of TOR kinase inhibitors on mRNA levels of the indicated genes *GAMYB*,  $\alpha$ -amylase, and *ABI5* in wheat embryos. The wheat embryos dissected from 1-DAG seeds were incubated for 24 h in the presence 10 mM  $\text{CaCl}_2$  (control) with or without 10  $\mu\text{M}$  ABA, or 1  $\mu\text{M}$  GA, or 1  $\mu\text{M}$  GA with rapamycin or torin1 as indicated. *TaABI5*, *GAMYB*, and  $\alpha$ -amylase cDNAs were amplified by RT-PCR with gene-specific primers. Ribosomal RNA was included as an internal control of sample loading. Rap: rapamycin.

|               |                                                                   |            |
|---------------|-------------------------------------------------------------------|------------|
| <b>p70S6K</b> | -----MAGVFDI-----DL                                               | <b>9</b>   |
| <b>AtS6K1</b> | MVSS-----QRPVFNKIQQKQYLSISPSNSVLKDDVELEFSDVFGPLPE-----            | <b>44</b>  |
| <b>OsS6K1</b> | MVSSEISSVTTTTHAQGPKLFRGKILLPMGPPDVVPSNEVEFDFSDVFGPTAVQTPTDLSI     | <b>60</b>  |
| <b>TaS6K1</b> | MVSSEIIPSVTTTHTQRPKLFTGMILLPKGPPDVVLPENVEFDFNDVFGATAVQTPTEVSI     | <b>60</b>  |
|               | : .***.                                                           |            |
| <b>p70S6K</b> | DQPEDA----GSEDELEEGGQLNESMDHGGVGPYELG-----MEHC                    | <b>46</b>  |
| <b>AtS6K1</b> | -----EANDIAYDEPAVVYSRSHSLVGPCSLDSHSLKLTCLTLETEDSIDLVEC            | <b>94</b>  |
| <b>OsS6K1</b> | LTPDSPAPLTESSEGIYNDPLVIVKRSHSLVGPSSLSVQSLPLSKLTLHESDSALDLEC       | <b>120</b> |
| <b>TaS6K1</b> | LTPGSPAPLAESNEEVYNDPVVITKRSHSLVGPSTSLVSQSLPLSKLTLHESESSLDLEC      | <b>120</b> |
|               | ::: : : .*.***.*                                                  |            |
| <b>p70S6K</b> | EK-----FEISETSVNRGPEKIRPECFELLRVLGKGGYGKVFQVRKV                   | <b>88</b>  |
| <b>AtS6K1</b> | LEGESLKENDDFSGNDDSDNEKALEGDLVKVSGVVGIDDFEVMKVVGKGAFGKVYQVRKK      | <b>154</b> |
| <b>OsS6K1</b> | TK-EKKSNDQEALSDEEL-----DDTKNENGVVGLDDFEVLKLVGQGAFGKVYQVRKK        | <b>171</b> |
| <b>TaS6K1</b> | LSKEKKSQGQSLSDLEEL-----NDTTKENEAVGLDDFELLKLVGQGAFGKVYQVRKK        | <b>172</b> |
|               | . : : **:::***.*:***:***:                                         |            |
| <b>p70S6K</b> | TGANTGKIFAMKVLKKAMIVRNAKDTAHTKAERNILEEVKHPFIVDLIYAFQTGGKLYLI      | <b>148</b> |
| <b>AtS6K1</b> | ---ETSEIYAMKVMRKDHIMEKN-HAEYMKAERDILTKIDHPFIVQLKYSFQTKYRLYLV      | <b>210</b> |
| <b>OsS6K1</b> | ---GTSEIYAMKVMRKDKILEKN-HAEYMKAERDILTKVDHPFVQLRYSFQTKYRLYLV       | <b>227</b> |
| <b>TaS6K1</b> | ---CTSDIYAMKVMRKDKILEKN-HAEYMKAERDILTKVDHPFVQLRYSFQTKYRLYLV       | <b>228</b> |
|               | *.**:***:* *::: : : **::** *::***:***:***:***:***:***:***:        |            |
| <b>p70S6K</b> | LEYLSGGELFMQLEREGIFMEDTACFYLAEISMAILGHLHQKGIYRDLKPENIMLNHQGH      | <b>208</b> |
| <b>AtS6K1</b> | LDFINGGHLFFQLYHQGLFREDLARVYTAEIVSAVSHLHEKGIHRDLKPENILMDTDGH       | <b>270</b> |
| <b>OsS6K1</b> | LDFINGGHLFFQLYQQGLFREELARIYTAEIVSAVAHLHANGIMHRDLKPENILLDADGH      | <b>287</b> |
| <b>TaS6K1</b> | LDFVNGGHLFFQLYQQGLFREELARIYTAEIVSAVAHLHANGIMHRDLKPENILLDAHGH      | <b>288</b> |
|               | *.**:***:***:***:***:***:***:***:***:***:***:***:***:***:***:***: |            |
| <b>p70S6K</b> | VKLTDFGLCKESIHDGTVTHTFCGTIEYMAPEILMRSGHNRAVDWWSLALMYDMLTGAP       | <b>268</b> |
| <b>AtS6K1</b> | VMLTDFGLAKEF-EENTRSNSMCGTTEYMAPEIVRGKGDKAADWWSVGIILLYEMLTGKP      | <b>329</b> |
| <b>OsS6K1</b> | AMLTDFGLAKEF-DENTRSNSMCGTVEYMAPEIVQGRGHDKAADWWSVGIILFEMLTGKP      | <b>346</b> |
| <b>TaS6K1</b> | AMLTDFGLAKEF-DENTRSNSMCGTVEYMAPEIVQGRGHDKAADWWSVGIILFEMLTGKP      | <b>347</b> |
|               | . *****.* *:::*** *****: **::*.***:* *::*** *                     |            |
| <b>p70S6K</b> | PFTGENRKKTIKILKCKLNLPPYLTQEARDLLKLLKRNAAASRLGAGPGDAGEVQAHPE       | <b>328</b> |
| <b>AtS6K1</b> | PFLGS-KGKIQQKIVKDKIKLPQFLSNEAHAILKGLLQKEPERRLGSGLSGAEEIKQHKW      | <b>388</b> |
| <b>OsS6K1</b> | PFVGGNRDKVQQKIVKEKIKLPAYLSSEVHSLKGLLHKEAGRRLGCGPGGSNEIKNHKW       | <b>406</b> |
| <b>TaS6K1</b> | PFVGGNRDKIQKIVKEKMKLPTYLSSEVHSLKGLLHKEAGRRLGSGPGGSDEIKNHKW        | <b>407</b> |
|               | ** * : * :***:* *::** :*:.*: :** **::: ***.* ..*::* :             |            |
| <b>p70S6K</b> | FRHINWEELLARKVEPPFKPLLQSEEDVSQFDSKFTRQTPVDSRDDSTLSESANQVFLGF      | <b>388</b> |
| <b>AtS6K1</b> | FKGINWKKLEAREVMPSFKPEVSGRQCIANFDKWCWTDMSVLDSPASSPSSDPKANPFTNF     | <b>448</b> |
| <b>OsS6K1</b> | FKSVNWKKLDQRQIQPSFRPNVAGKTCIANFDECWTSMPVLDSPVAVPAA--DSNFVGF       | <b>464</b> |
| <b>TaS6K1</b> | FKAVNWKKLEARQITPSFCPNVAGQTCIANFDECWTSMPVLDSPVAVPAA--DSNFVGF       | <b>465</b> |
|               | *: :***:* *::: * * * : .. :***. * * : *** * : . * .*              |            |
| <b>p70S6K</b> | TYVAPSVLESVKEKFSFEPKIRSPRRFIGSPRTPVSPVKFSPGDFWGRGASASTANPQTP      | <b>448</b> |
| <b>AtS6K1</b> | TYVRPPPSFLHQSTTTL*-----                                           | <b>465</b> |
| <b>OsS6K1</b> | SYVRPAPFLQRPSPLG*-----                                            | <b>480</b> |
| <b>TaS6K1</b> | SYVRPEPFLQKPSPLG*-----                                            | <b>481</b> |
|               | :** *                                                             |            |
| <b>p70S6K</b> | VEYPMETSGIEQMDVTMSGEASAPLPIRQPNSGPKYKQAFPMISKRPEHLRMNL*           | <b>502</b> |
| <b>AtS6K1</b> | -----                                                             | <b>465</b> |
| <b>OsS6K1</b> | -----                                                             | <b>480</b> |
| <b>TaS6K1</b> | -----                                                             | <b>481</b> |

**Supplementary Figure S4.** Protein sequence alignment of putative *T. aestivum* S6K1, *A. thaliana* S6K1, *Oryza sativa* S6K1, and human S6K1. The deduced amino acid sequences were aligned in the ClustalX 2.1 software. Asterisks (\*), colons (:), and periods (.) indicate identical, conserved, and semiconserved aligned residues, respectively.

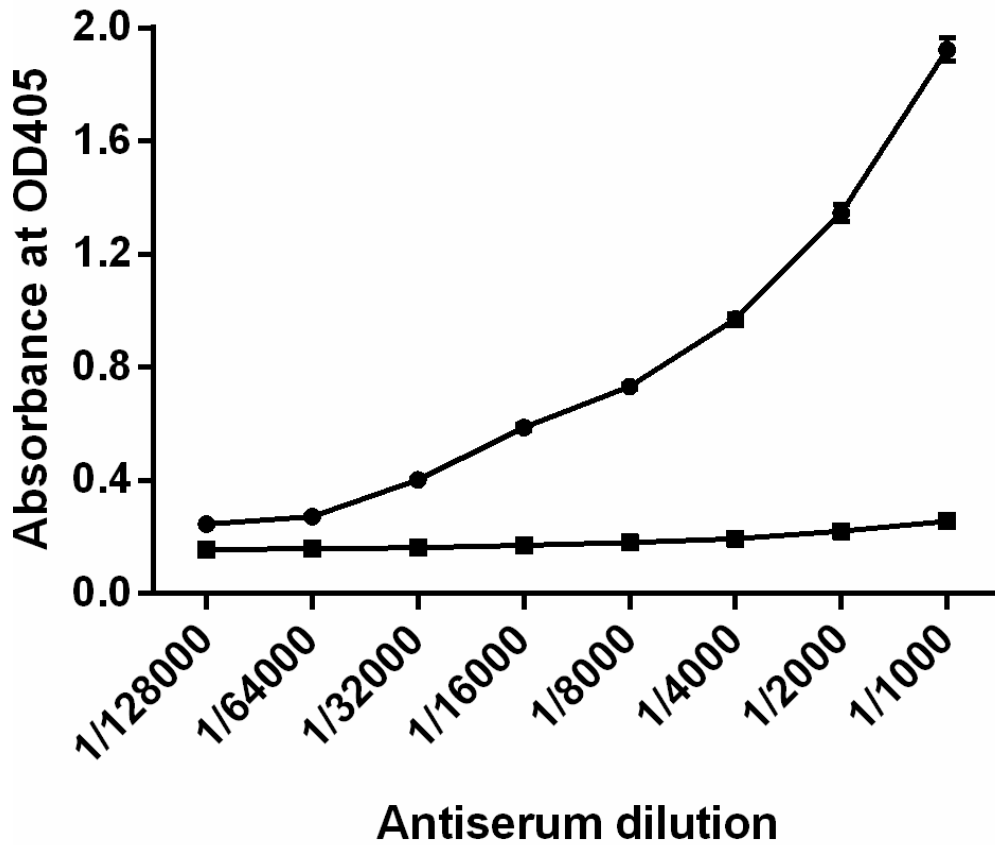

**Supplementary Figure S5.** The titer of antiserum according to the ELISA. The purified antibody was subjected to serial dilution (from 1000- to 128,000-fold) and reacted with the purified rTaS6K1 protein. Preimmunization rabbit serum served as a negative control. The antibody titer is defined as the highest dilution of serum at which the  $A_{405}$  ratio ( $A_{405}$  of postimmunization serum/ $A_{405}$  of preimmunization serum) is greater than 2:1. Data are presented as the mean  $\pm$  standard deviation.
